# Supplementary material
Source: HighWire-hosted journal article supplement (http://molpharm.aspetjournals.org/highwire/filestream/84723/field_highwire_adjunct_files/0/117549_Suplemmental_Data.pdf)
Supplement: 117549_Suplemmental_Data.pdf [file 117549_Suplemmental_Data.pdf]

**Characterization and optimization of the novel TRPM2 antagonist tatM2NX**

Cruz-Torres, I.; Backos, D.S.; and Herson, P.S.

*Department of Pharmacology, University of Colorado School of Medicine, Aurora, CO, USA  
(I.C.T, P.S.H.)*

*Department of Pharmaceutical Sciences, University of Colorado Skaggs School of Pharmacy and  
Pharmaceutical Sciences, Aurora, CO, USA (D.S.B.)*

*Department of Anesthesiology, University of Colorado School of Medicine, Aurora, CO, USA  
(P.S.H.)*

*Neuronal Injury & Plasticity Program, University of Colorado School of Medicine, Aurora, CO,  
USA (I.C.T, P.S.H.)*

**Corresponding author:** Ivelisse Cruz-Torres ([ivelisse.cruz-torres@ucdenver.edu](mailto:ivelisse.cruz-torres@ucdenver.edu)), Paco S.  
Herson ([paco.herson@ucdenver.edu](mailto:paco.herson@ucdenver.edu)); telephone: 303-724-6628; fax: 303-724-1761

Address: Department of Pharmacology, University of Colorado School of Medicine, Aurora, CO,  
USA

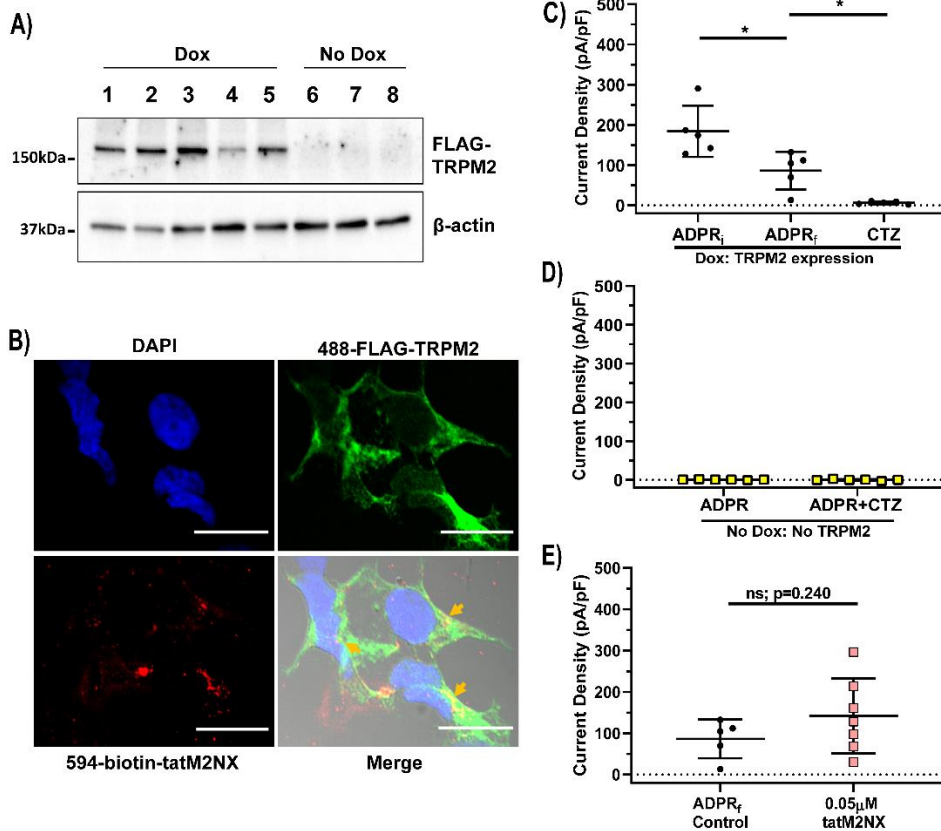

**Supplemental Figure 1. TRPM2 protein is expressed and functional in doxycycline-inducible HEK293 cells.** A) TRPM2 expression detected in HEK293 cells treated with doxycycline (1  $\mu$ g/mL) (Dox). No expression in un-treated HEK293 cells (No Dox). B) TRPM2 is expressed in HEK293 cells 16-18h after doxycycline treatment (n=3). Biotin-tatM2NX is found in cells within 1h incubation in the media (yellow arrows). ICC: DAPI (blue), N-terminal FLAG-TRPM2 (green), N-terminal biotin-tagged tatM2NX (red). Scale bar is 25  $\mu$ m. C) Rundown (ADPR<sub>i</sub>) current density is significantly decreased from ADPR<sub>i</sub> current, while CTZ completely inhibits ADPR<sub>i</sub>. D) No TRPM2 activity is observed in HEK293 cells in the absence of doxycycline (No Dox). E) ADPR<sub>i</sub> compared to 0.05  $\mu$ M tatM2NX (ineffective concentration, same group as Figure 2C). All data represented as mean  $\pm$  SD and significance established as p < 0.05 for n  $\geq$  5-6 for electrophysiology.

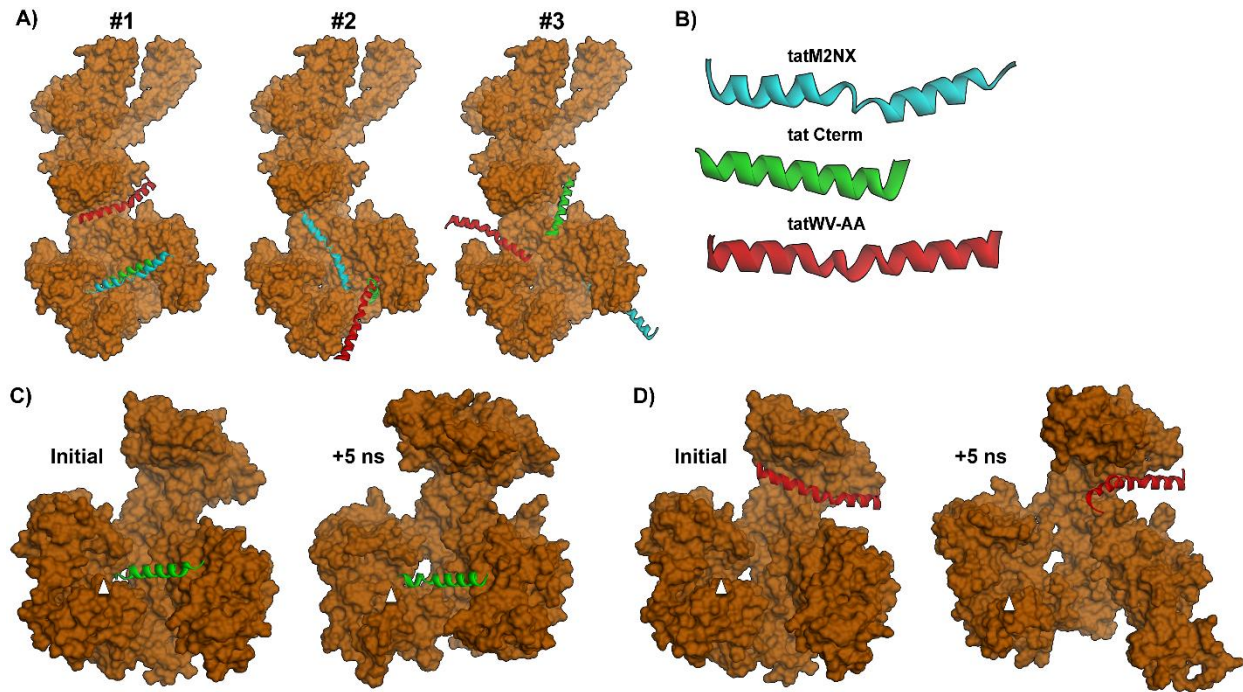

**Supplemental Figure 2. Molecular modeling of tat Cterm and tatWV-AA with human TRPM2 channel NUDT9-H domain.** A) Top three scoring clusters of tatM2NX (cyan), tat Cterm (green), and tatWV-AA (red) in complex with a single monomer of TRPM2 (orange). B) Predicted secondary structure of tatM2NX (cyan) compared to tat Cterm (green) and tatWV-AA (red) after MD-based refinement. Peptides are oriented N-term (left) to C-term (right). C) Top scoring initial TRPM2-tat Cterm complex (left) and the same complex after 5ns of MD simulation (right). D) Top scoring initial TRPM2-tatWV-AA complex (left) and the same complex after 5ns of MD simulation (right).

**Supplemental Table 1. tat Cterm non-covalent interactions**

| Interaction (A=TPRM2, E=Peptide)     | Interaction Category            | Interaction Type               |
|--------------------------------------|---------------------------------|--------------------------------|
| A:ARG1336:HH12 - E:GLU20:OE2         | Hydrogen Bond;<br>Electrostatic | Salt Bridge; Attractive Charge |
| A:ARG1392:HH22 - E:VAL23:O           | Hydrogen Bond;<br>Electrostatic | Salt Bridge; Attractive Charge |
| E:LYS5:HZ2 - A:GLU71:OE1             | Hydrogen Bond;<br>Electrostatic | Salt Bridge; Attractive Charge |
| E:ARG6:HH22 - A:ASP148:OD2           | Hydrogen Bond;<br>Electrostatic | Salt Bridge; Attractive Charge |
| E:ARG9:HH11 - A:ASP148:OD1           | Hydrogen Bond;<br>Electrostatic | Salt Bridge; Attractive Charge |
| A:ARG1336:NH2 - E:GLU20:OE1          | Electrostatic                   | Attractive Charge              |
| A:ARG1392:NH1 - E:VAL23:OXT          | Electrostatic                   | Attractive Charge              |
| A:ARG1433:NH1 - E:VAL23:O            | Electrostatic                   | Attractive Charge              |
| E:TYR1:N - A:GLU71:OE1               | Electrostatic                   | Attractive Charge              |
| E:ARG6:NH1 - A:ASP148:OD2            | Electrostatic                   | Attractive Charge              |
| E:ARG6:NH2 - A:ASP148:OD1            | Electrostatic                   | Attractive Charge              |
| E:ARG6:NH2 - A:ASP289:OD1            | Electrostatic                   | Attractive Charge              |
| E:ARG9:NH1 - A:ASP289:OD1            | Electrostatic                   | Attractive Charge              |
| E:TRP22:HE1 - A:TYR1485:OH           | Hydrogen Bond                   | Conventional Hydrogen Bond     |
| E:LYS5:HE1 - A:GLU71:O               | Hydrogen Bond                   | Carbon Hydrogen Bond           |
| E:ARG9:HD2 - A:ASP148:OD1            | Hydrogen Bond                   | Carbon Hydrogen Bond           |
| E:ARG6:NH2 - A:PHE75                 | Electrostatic                   | Pi-Cation                      |
| A:LEU1381:C,O;SER1382:N -<br>E:TRP22 | Hydrophobic                     | Amide-Pi Stacked               |
| A:PRO150 - E:LYS5                    | Hydrophobic                     | Alkyl                          |
| A:HIS118 - E:ARG3                    | Hydrophobic                     | Pi-Alkyl                       |
| E:TRP22 - A:LEU1381                  | Hydrophobic                     | Pi-Alkyl                       |

\*3 letter denotes the amino acid; A: TRPM2; E: peptide

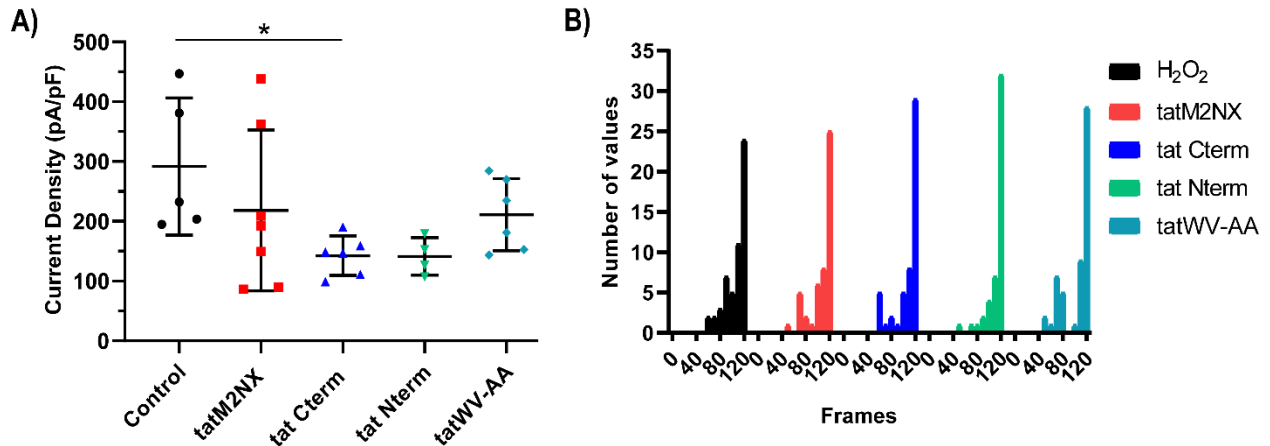

**Supplemental Figure 3. No changes in ADPR<sub>i</sub> current density or frequency distribution in Ca<sup>2+</sup> fluorescence in the presence of peptides.** A) ADPR<sub>i</sub> current density was significant ( $p=0.0489$ ,  $n=6$ ) for the peptide tat Cterm. B) Histogram of number of events vs. frames (1 frame=10sec, total 120 frames) in HEK293 cells expressing TRPM2 in response to H<sub>2</sub>O<sub>2</sub> in the presence of peptides. All electrophysiology data represented as mean  $\pm$ SD, statistical significance at  $p<0.05$  for  $n\geq 4-10$  (at least 3 experimental days/condition). For Ca<sup>2+</sup> imaging, histogram was generated from  $n\geq 25-53$  (4-6 experimental days).

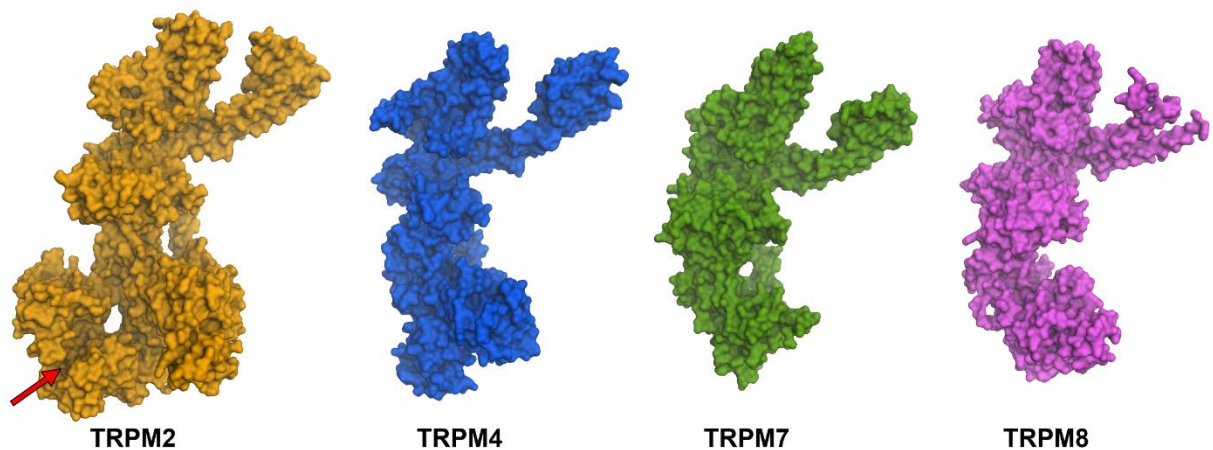

**Supplemental Figure 4. Comparison between the tertiary structures of human TRPM2 (orange), human TRPM4 (blue), mouse TRPM7 (green), and TRPM8 (magenta) (PDB IDs: 6MIX, 6BQR, 5ZX5, and 6NR4, respectively).** Arrow indicates the proposed binding site for tatMXN2 within the human ADPR binding pocket, which is not present in the other TRPM family members. This suggests a low potential for tatMXN2 to inhibit other TRPM family members.
